# Supplementary material for: Effect of calcination temperature on the porous structure of cobalt oxide micro-flowers
Source: Royal Society of Chemistry journal article supplement (doi:10.1039/c1ce05943b), 2011-11-30
Supplement: c1ce05943b.pdf [file c1ce05943b.pdf]

## Effect of calcination temperature on the porous structure of cobalt oxide microflowers

X. Chen, J.P. Cheng\*, Q.L. Shou, F. Liu, X.B. Zhang

State Key Laboratory of Silicon Materials, Department of Materials Science and Engineering,  
Zhejiang University, Hangzhou 310027, China

\*Corresponding author. E-mail address: chengjp@zju.edu.cn;

Fax/Tel.: +86-571-87951411

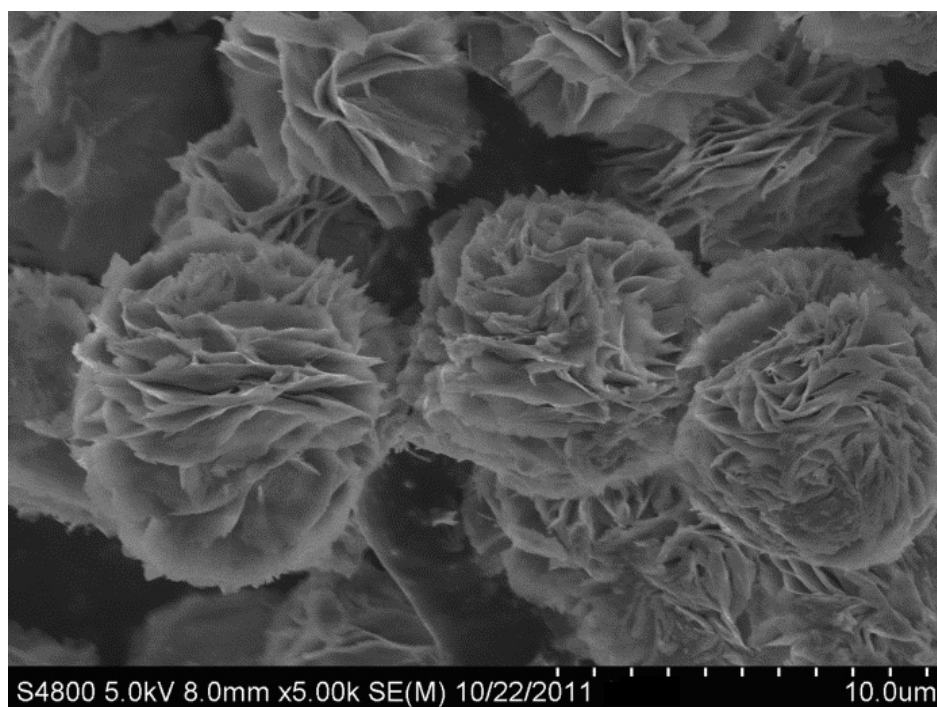

Fig. S1 SEM image of  $\text{Co(OH)}_2$  prepared by halving the amount of ammonia, showing that the morphology and structure had few significant changes.

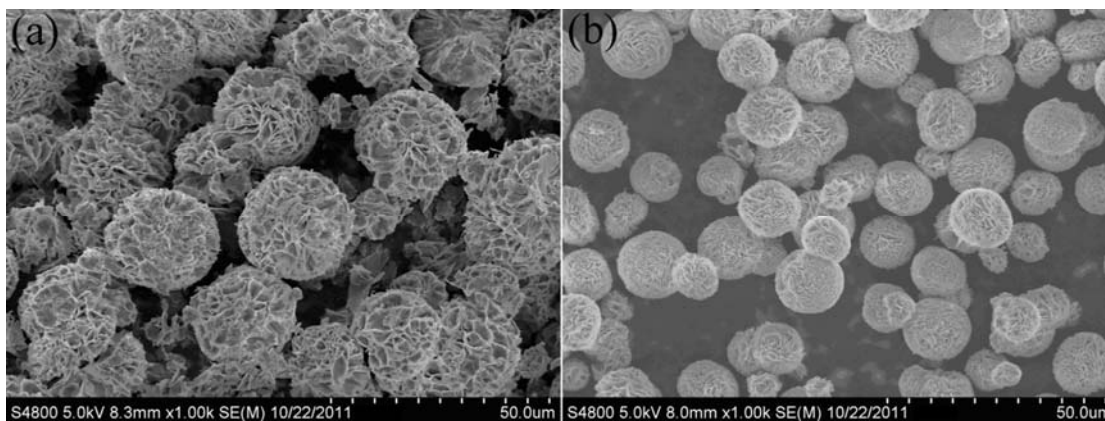

Fig. S2 SEM images of  $\text{Co}(\text{OH})_2$  prepared by (a) halving and (b) doubling the concentration of acetate group. It can be observed that when the concentration of acetate group was halved or doubled, the changes of the morphologies of as-prepared  $\text{Co}(\text{OH})_2$  were not obvious.

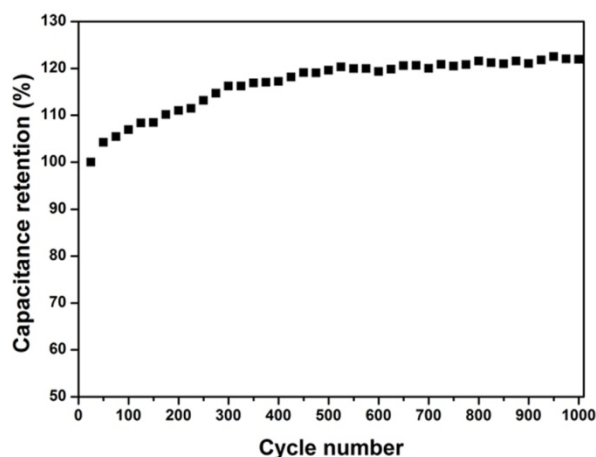

Fig. S3 Cycle-life data of  $\text{Co}_3\text{O}_4$  calcined at 300 °C calculated from the CV measurements at a scan rate of 20  $\text{mV s}^{-1}$ .

Fig. S3 is the specific capacitance relation with cycling number of  $\text{Co}_3\text{O}_4$  calcined at 300 °C calculated from CV measurements at 20  $\text{mV s}^{-1}$ . The capacitance increased about 20 % during the first 500 cycles. It indicates that the electrode is fully activated and reaches the optimum condition after 500 cycles. After 1000 cycles, the capacitance had almost no decrease which demonstrated the excellent cycle stability.
